# Supplementary material
Source: PubMed Central journal article supplement (PMC5077675)
Supplement: NIHMS802034-supplement-Supplement.pdf [file NIHMS802034-supplement-Supplement.pdf]

**Supplementary Table 1. Tumor and patient characteristics, SEER Other<sup>1</sup>(2004-10), SEER Detroit (2004-10), and PLG (1996-2006) by thickness subgroup**

| Characteristic    | Thickness (mm)     |         |          |                    |         |          |                    |         |         |                    |         |      |
|-------------------|--------------------|---------|----------|--------------------|---------|----------|--------------------|---------|---------|--------------------|---------|------|
|                   | 0.01-0.25mm        |         |          | 0.26-0.50mm        |         |          | 0.51-0.75mm        |         |         | 0.76-1.00mm        |         |      |
|                   | SEER               |         |          | SEER               |         |          | SEER               |         |         | SEER               |         |      |
|                   | Other <sup>1</sup> | Detroit | PLG      | Other <sup>1</sup> | Detroit | PLG      | Other <sup>1</sup> | Detroit | PLG     | Other <sup>1</sup> | Detroit | PLG  |
| n=10,911          | n=447              | n=197   | n=21,926 | n=832              | n=545   | n=11,633 | n=425              | n=343   | n=7,385 | n=251              | n=230   |      |
| %                 |                    |         | %        |                    |         | %        |                    |         | %       |                    |         |      |
| <b>Level</b>      |                    |         |          |                    |         |          |                    |         |         |                    |         |      |
| II                | 71.2               | 69.4    | 94.4     | 66.0               | 58.3    | 63.1     | 27.9               | 19.8    | 20.7    | 9.3                | 4.8     | 3.9  |
| III               | 9.4                | 8.3     | 4.1      | 21.9               | 31.0    | 31.0     | 47.1               | 48.9    | 49.6    | 42.8               | 34.7    | 44.8 |
| IV & V            | 10.0               | 13.9    | 1.5      | 4.4                | 6.1     | 5.9      | 17.2               | 27.1    | 29.7    | 39.9               | 56.2    | 50.9 |
| Localized NOS     | 8.2                | 8.1     | ---      | 7.1                | 4.6     | ---      | 7.1                | 4.2     | ---     | 7.0                | 4.0     | ---  |
| Unknown           | 1.2                | 0.5     | 0.0      | 0.7                | 0.0     | 0.0      | 0.8                | 0.0     | 0.0     | 1.1                | .4      | 0.0  |
| <b>Ulceration</b> |                    |         |          |                    |         |          |                    |         |         |                    |         |      |
| Not Present       | 94.6               | 95.1    | 100.0    | 97.8               | 96.9    | 99.5     | 96.5               | 94.6    | 99.7    | 92.8               | 95.4    | 96.1 |
| Present           | 5.4                | 4.9     | 0.0      | 2.2                | 3.2     | 0.5      | 3.5                | 5.4     | 0.3     | 7.2                | 4.6     | 3.9  |

<sup>1</sup>Seer Other registries include Seattle, Metropolitan Atlanta, Hawaii, Los Angeles, San Francisco-Oakland, Utah, Iowa, Greater California, Kentucky, New Jersey, San Jose/Monterey, Connecticut, Greater Georgia, New Mexico and Louisiana.

Abbreviations: SEER, Surveillance, Epidemiology and End Results; PLG, Pigmented Lesion Group, NOS, not otherwise stated.

**Supplementary Table 2. Thickness Coding Errors Among 1,955 Thin Melanomas**

|                      | Thickness   |      |             |      |             |      |             |      |          |      |
|----------------------|-------------|------|-------------|------|-------------|------|-------------|------|----------|------|
|                      | 0.01-0.25mm |      | 0.26-0.50mm |      | 0.51-0.75mm |      | 0.76-1.00mm |      | All Thin |      |
|                      | n           | %    | n           | %    | n           | %    | n           | %    | n        | %    |
| Chart not found      | 15          | 3.4  | 11          | 1.3  | 11          | 2.6  | 7           | 2.8  | 44       | 2.3  |
| Correct              | 318         | 71.1 | 790         | 95.0 | 389         | 91.5 | 224         | 89.2 | 1721     | 88.0 |
| Error                | 114         | 25.5 | 31          | 3.7  | 25          | 5.9  | 20          | 8.0  | 190      | 9.7  |
| <b>Type of Error</b> | n=114       |      | n=31        |      | n=25        |      | n=20        |      | n=190    |      |
| 10-fold increase     | 84          | 73.7 | 18          | 58.1 | 11          | 44.0 | 2           | 10.0 | 115      | 60.5 |
| 100-fold increase    | 12          | 10.5 | 0           | 0.0  | 0           | 0.0  | 0           | 0.0  | 12       | 6.3  |
| 0.1-fold decrease    | 1           | 0.9  | 1           | 3.2  | 0           | 0.0  | 0           | 0.0  | 2        | 1.1  |
| Other                | 17          | 14.9 | 12          | 38.7 | 14          | 56.0 | 18          | 90.0 | 61       | 32.1 |

**Supplementary Table 3. Reclassification after correction (n=1,955)**

|                              | Pre-Review Thickness |             |             |             |
|------------------------------|----------------------|-------------|-------------|-------------|
|                              | 0.01-0.25mm          | 0.26-0.50mm | 0.51-0.75mm | 0.76-1.00mm |
|                              | n=447                | n=832       | n=425       | n=251       |
|                              | %                    |             |             |             |
| <b>Post-Review Thickness</b> |                      |             |             |             |
| 0.01-0.25mm                  | 74.9                 | 0.2         | 0.0         | 0.4         |
| 0.26-0.50mm                  | 6.7                  | 95.8        | 0.7         | 0.8         |
| 0.51-0.75mm                  | 1.8                  | 0.4         | 92.9        | 0.4         |
| 0.76-1.00mm                  | 2.9                  | 0.0         | 0.5         | 92.8        |
| 1.01-9.80mm                  | 10.3                 | 2.3         | 3.3         | 2.8         |
| Chart not found              | 3.4                  | 1.3         | 2.6         | 2.8         |

**Supplementary Table 4. SEER cases**

| SEER Cohort                                | SEER      |          | SEER      |          | Detroit SEER |          |
|--------------------------------------------|-----------|----------|-----------|----------|--------------|----------|
|                                            | 1988-2003 |          | 2004-2010 |          | 2004-2010    |          |
| Malignant cutaneous melanomas <sup>1</sup> | 112,589   | Tumors   | 123,108   | Tumors   | 4,548        | Tumors   |
| Only 1 primary melanoma                    | 75,794    | Patients | 84,820    | Patients | 3,186        | Patients |
| Not diagnosed at autopsy                   | 75,577    | Patients | 84,581    | Patients | 3,178        | Patients |
| No metastasis at diagnosis                 | 68,189    | Patients | 77,566    | Patients | 2,987        | Patients |
| Thickness not missing                      | 60,942    | Patients | 72,619    | Patients | 2,728        | Patients |
| 16 SEER registries <sup>2</sup>            | 60,857    | Patients | 72,491    | Patients | ---          | Patients |
| 0.01-1.00mm                                | 42,795    | Patients | 51,855    | Patients | 1,955        | Patients |
| 0.01-0.25mm                                | 8,023     | Patients | 10,911    | Patients | 447          | Patients |
| Survival Time > 0                          | 60,201    | Patients | 69,927    | Patients | ---          | Patients |
| 0.01-1.00mm                                | 42,248    | Patients | 49,726    | Patients | 1,898        | Patients |
| 0.01-0.25mm                                | 7,911     | Patients | 10,388    | Patients | 432          | Patients |

Abbreviations: SEER, Surveillance, Epidemiology and End Results.

<sup>1</sup>International Classification of Diseases for Oncology (ICD-O) codes for melanoma histological types: ICD-O-3 = 8720-8799. A case was included only if the ICD-O code indicated a malignant behavior type (behavior code= 3) and the case had a primary site of skin (Primary site = 440-449).

<sup>2</sup>The two excluded SEER registries reported only 9 and 76 melanoma patients.
